# Supplementary material for: Copper(ii) hydrazone complexes with different nuclearities and geometries: synthetic methods and ligand substituent effects
Source: Royal Society of Chemistry journal article supplement (doi:10.1039/c6nj01036a), 2016-01-01
Supplement: c6nj01036a1.pdf [file c6nj01036a1.pdf]

## Electronic Supplementary Information (ESI)

# Copper(II) hydrazone complexes with different nuclearities and geometries: synthetic methods and ligand substituent effects

Višnja Vrdoljak\*, Gordana Pavlović, Nadica Maltar-Strmečki, and Marina Cindrić

## Contents

|                                                                                                                                                                                                                                                                                                                                                                                                                                                                  |    |
|------------------------------------------------------------------------------------------------------------------------------------------------------------------------------------------------------------------------------------------------------------------------------------------------------------------------------------------------------------------------------------------------------------------------------------------------------------------|----|
| Powder X-ray diffraction patterns.....                                                                                                                                                                                                                                                                                                                                                                                                                           | 2  |
| <b>Fig. S1</b> PXRD patterns of: <b>1α</b> obtained upon reaction in methanol at room temperature; <b>1β</b> obtained upon thermally induced transformation in the solid state; and <b>1β</b> calculated from the X-ray single-crystal structure.                                                                                                                                                                                                                |    |
| <b>Fig. S2</b> Photos of single crystals of <b>2MeOH</b> synthesized by (a) the solvothermal synthesis and (b) by the conventional solution-based method at reflux temperature.                                                                                                                                                                                                                                                                                  |    |
| <b>Fig. S3</b> PXRD patterns of sample obtained upon standing of <b>2MeOH</b> at room temperature for 12 h; sample obtained upon standing of <b>2MeOH</b> for 5 min; and PXRD pattern of <b>2MeOH</b> calculated from the X-ray single-crystal structure.                                                                                                                                                                                                        |    |
| <b>Fig. S4</b> PXRD patterns of <b>3</b> : (a) obtained by the solid state thermally induced synthesis, (b) obtained by the solvothermal method in MeOH and (c) obtained by the conventional solution-based method in EtOH; (e) PXRD patterns of <b>3MeOH</b> obtained by the electrochemical synthesis in MeOH. The black lines (d) and (f) indicate patterns of <b>3</b> and <b>3MeOH</b> , respectively, calculated from the X-ray single-crystal structures. |    |
| <b>Fig. S5</b> PXRD patterns for the polinuclear complex <b>1py*</b> calculated from the X-ray single-crystal structure, the dinuclear complex <b>1py</b> obtained by the conventional solution-based method; <b>1py</b> obtained upon an exposure of <b>1β</b> to pyridine vapours; <b>1β</b> obtained by the solid state thermally induced synthesis form <b>1py</b> and <b>1β</b> calculated from the X-ray single-crystal structure.                         |    |
| <b>Fig. S6</b> PXRD patterns of: <b>3MeOH</b> obtained upon an exposure of the unsolvated complex $[\text{Cu}_2(\text{L}^{4\text{OMe}})_2]$ to methanol vapours; <b>3MeOH</b> obtained by the electrochemical synthesis in MeOH; and <b>3MeOH</b> calculated from the X-ray single-crystal structure.                                                                                                                                                            |    |
| X-Ray Crystallography. Single crystal diffraction.....                                                                                                                                                                                                                                                                                                                                                                                                           | 5  |
| <b>Table S1.</b> Selected bond lengths [Å] and angles [°] for complexes: <b>1β</b> , <b>1py*</b> , <b>2py</b> , <b>3</b> and <b>3MeOH</b> .                                                                                                                                                                                                                                                                                                                      |    |
| <b>Table S2.</b> Dihedral angles (°) and atoms defining planes in complexes <b>1β</b> , <b>1py*</b> , <b>2py</b> , <b>3</b> and <b>3MeOH</b> .                                                                                                                                                                                                                                                                                                                   |    |
| <b>Table S3.</b> Hydrogen bonds and interactions for complexes: <b>1β</b> , <b>1py*</b> , <b>2py</b> , <b>3</b> , <b>3MeOH</b> , <b>EtOH</b> .                                                                                                                                                                                                                                                                                                                   |    |
| <b>Table S4.</b> Selected bond lengths [Å] for complex <b>2MeOH</b> .                                                                                                                                                                                                                                                                                                                                                                                            |    |
| <b>Table S5.</b> Selected bond lengths [Å] for complex <b>2EtOH</b> .                                                                                                                                                                                                                                                                                                                                                                                            |    |
| <b>Fig. S7</b> Fraction of crystal structure of (a) <b>1py*</b> , (b) <b>2py</b> and (c) <b>3MeOH</b> .                                                                                                                                                                                                                                                                                                                                                          |    |
| <b>Fig. S8</b> Fraction of crystal structure of (a) <b>1β</b> and (b) <b>3</b> .                                                                                                                                                                                                                                                                                                                                                                                 |    |
| Ligands.....                                                                                                                                                                                                                                                                                                                                                                                                                                                     | 12 |
| <b>Table S6</b> <sup>1</sup> H and <sup>13</sup> C chemical shifts (ppm) of compounds <b>H<sub>2</sub>L<sup>H</sup></b> , <b>H<sub>2</sub>L<sup>3OMe</sup>·H<sub>2</sub>O</b> and <b>H<sub>2</sub>L<sup>4OMe</sup>·H<sub>2</sub>O</b> .                                                                                                                                                                                                                          |    |
| Reaction conditions for solution based synthetic methods and yields.....                                                                                                                                                                                                                                                                                                                                                                                         | 13 |

## Powder X-ray diffraction patterns

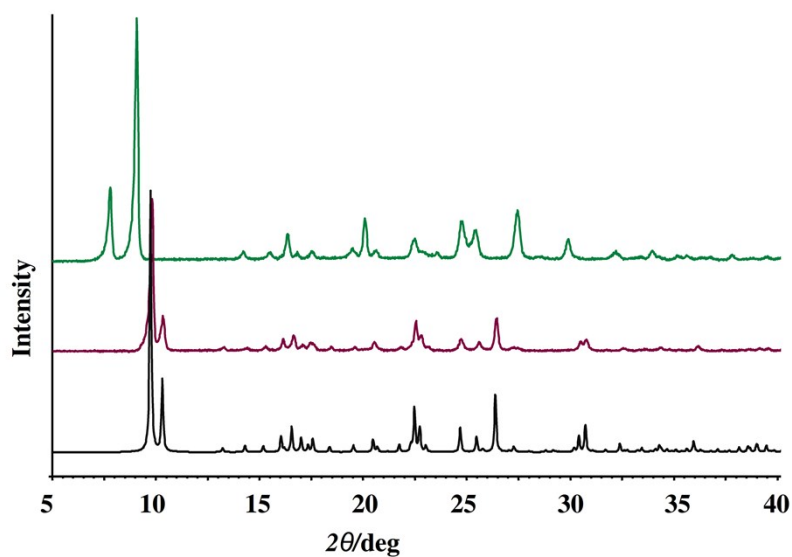

**Fig. S1** PXR patterns of: **1 $\alpha$**  obtained upon reaction in methanol at room temperature (top); **1 $\beta$**  obtained upon thermally induced transformation in the solid state (middle); and **1 $\beta$**  calculated from the X-ray single-crystal structure (bottom).

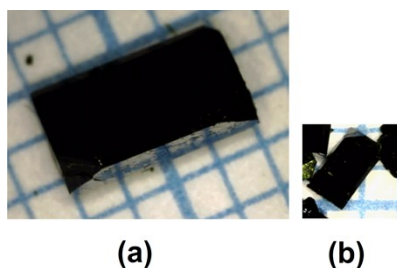

**Fig. S2** Photos of single crystals of **2MeOH** synthesized by (a) the solvothermal synthesis, (b) the conventional solution-based method at reflux temperature.

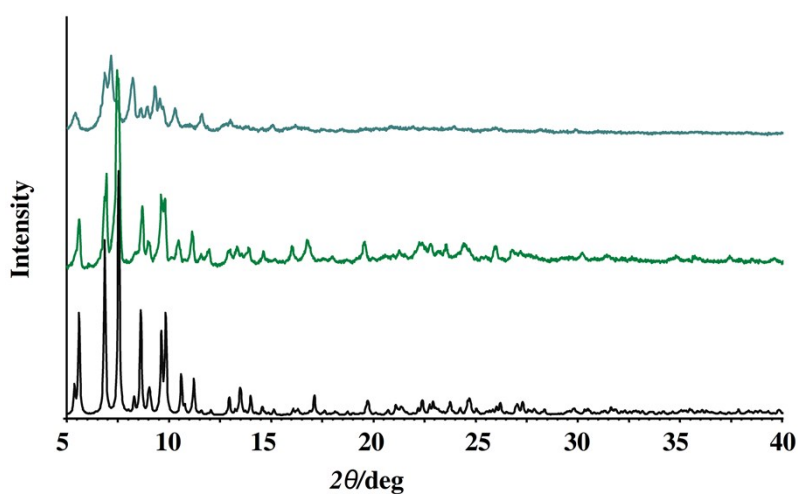

**Fig. S3** PXR patterns of sample obtained upon standing of **2MeOH** at room temperature for 12 h (top); sample obtained upon standing of **2MeOH** at room temperature for 5 min (middle); and PXR pattern of **2MeOH** calculated from the X-ray single-crystal structure (bottom).

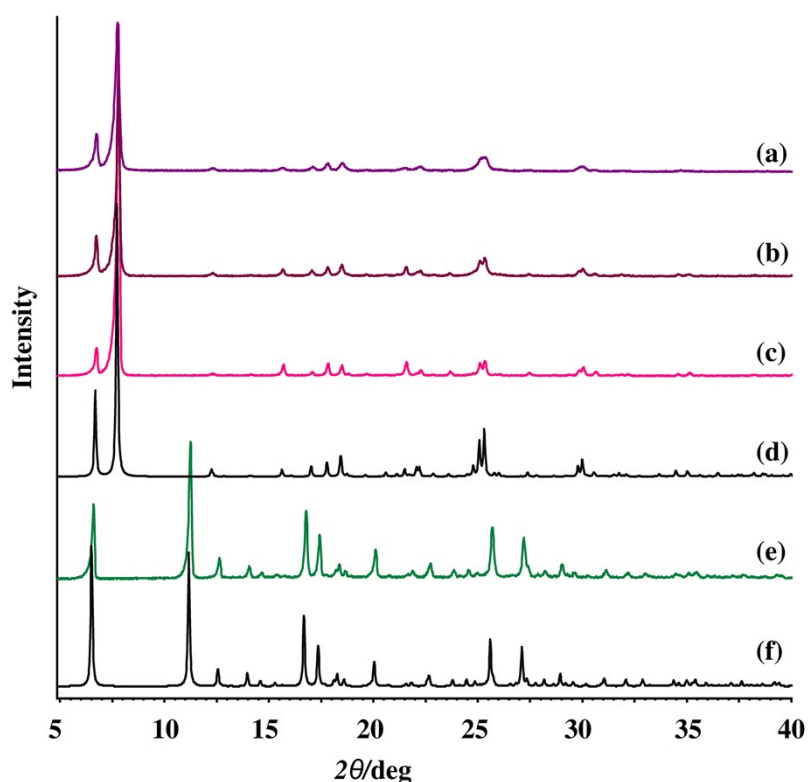

**Fig. S4** PXRD patterns of (a) **3** obtained by the solid state thermally induced synthesis, (b) **3** obtained by the solvothermal method in MeOH and (c) **3** obtained by the conventional solution-based method in EtOH; (e) PXRD patterns of **3MeOH** obtained by the electrochemical synthesis in MeOH. The black lines (d) and (f) indicate patterns of **3** and **3MeOH**, respectively, calculated from the X-ray single-crystal structures.

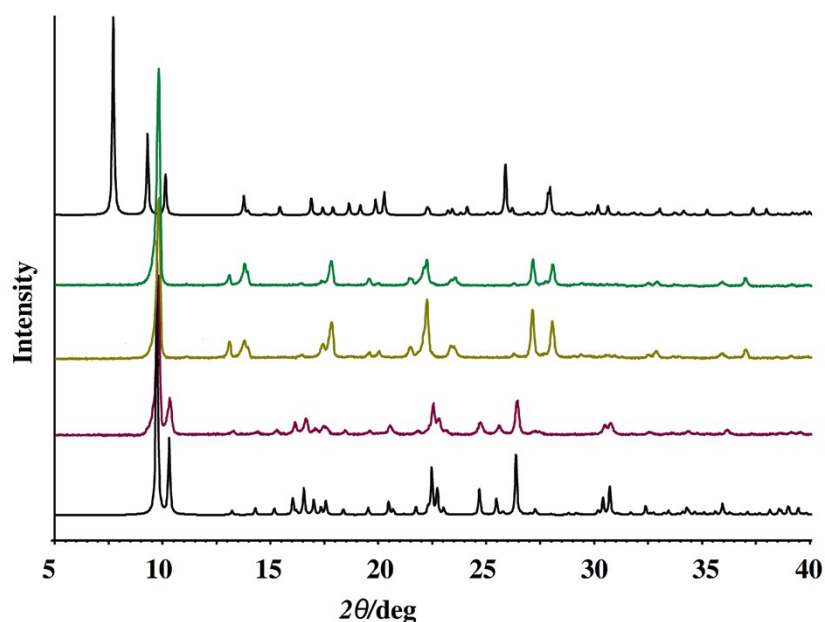

**Fig. S5** PXRD patterns (from top to bottom) for: the polinuclear complex **1py\*** calculated from the X-ray single-crystal structure; the dinuclear complex **1py** obtained by the conventional solution-based method; **1py** obtained upon an exposure of **1β** to pyridine vapours; the dinuclear complex **1β** obtained by the solid state thermally induced synthesis from **1py**; and **1β** calculated from the X-ray single-crystal structure.

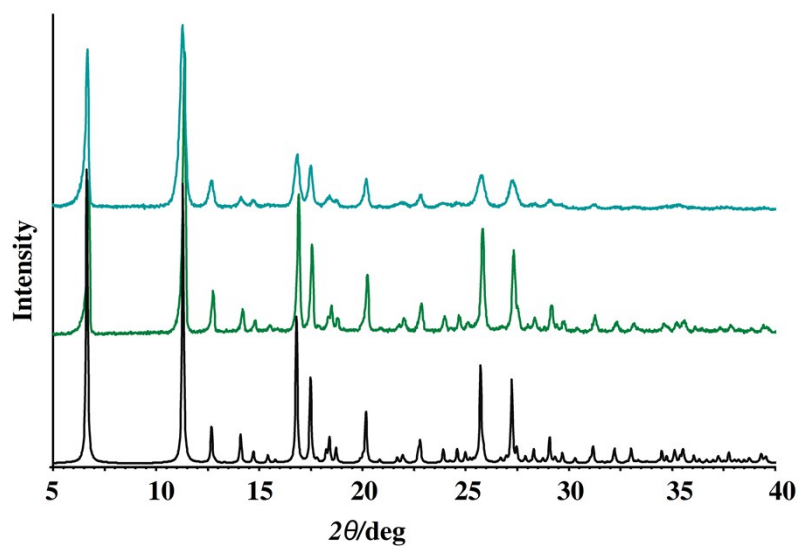

**Fig. S6** PXRd patterns of: **3MeOH** obtained upon an exposure of the unsolvated complex  $[\text{Cu}_2(\text{L}^{4\text{OMe}})_2]$  to methanol vapours (top); **3MeOH** obtained by the electrochemical synthesis in MeOH (middle); and **3MeOH** calculated from the X-ray single-crystal structure (bottom).

## X-Ray Crystallography. Single crystal diffraction.

**Table S1.** Selected bond lengths [Å] and angles [°] for complexes: **1β**, **1py\***, **2py**, **3** and **3MeOH**

| Complex                               | <b>1β</b>   | <b>1py*</b> | <b>2py</b>  | <b>3</b>   | <b>3MeOH</b> |
|---------------------------------------|-------------|-------------|-------------|------------|--------------|
| Bond length                           |             |             |             |            |              |
| Cu1–N1                                | 1.9140 (18) | 1.928 (3)   | 1.921 (3)   | 1.905(2)   | 1.9127 (16)  |
| Cu1–O1                                | 1.9226 (16) | 1.943 (3)   | 1.927 (3)   | 1.918(2)   | 1.9469 (14)  |
| Cu1–O2                                | 1.9376 (16) | 1.905 (3)   | 1.883 (3)   | 1.944(2)   | 1.9574 (13)  |
| Cu1–N3                                |             | 2.011 (3)   | 2.001 (3)   |            |              |
| Cu1–O2 <sup>i</sup>                   | 1.9540 (15) | 2.870(4)    |             | 1.968(2)   | 1.9724 (13)  |
| Cu1–O5                                |             |             |             |            | 2.501(2)     |
| Cu1⋯Cu1 <sup>i</sup>                  | 2.9827 (11) |             |             | 3.0052 (7) | 3.0316 (5)   |
| N1–C8                                 | 1.284 (3)   | 1.279 (5)   | 1.293 (5)   | 1.275(4)   | 1.281 (2)    |
| N1–N2                                 | 1.404 (2)   | 1.397 (4)   | 1.401 (4)   | 1.397(3)   | 1.395 (2)    |
| N2–C1                                 | 1.327 (3)   | 1.320 (5)   | 1.322 (5)   | 1.306(4)   | 1.314 (2)    |
| O1–C1                                 | 1.294 (2)   | 1.284 (4)   | 1.299 (4)   | 1.297(3)   | 1.296 (2)    |
| O2–C10                                | 1.362 (2)   | 1.316 (5)   | 1.305 (5)   | 1.352(3)   | 1.350 (2)    |
| Bond angles                           |             |             |             |            |              |
| N1–Cu1–O1                             | 81.50 (7)   | 80.83 (11)  | 81.17 (13)  | 81.54(9)   | 81.37 (6)    |
| N1–Cu1–O2                             | 92.95 (7)   | 92.13 (12)  | 93.06 (13)  | 93.96(9)   | 93.10 (6)    |
| O1–Cu1–O2                             | 170.49 (6)  | 170.61 (13) | 174.19 (12) | 175.49(8)  | 173.81 (6)   |
| N1–Cu1–O2 <sup>i</sup>                | 172.33 (7)  | 91.21(12)   |             | 172.66(9)  | 168.11 (6)   |
| O1–Cu1–O2 <sup>i</sup>                | 105.94 (6)  | 87.08(12)   |             | 104.85(8)  | 105.98 (5)   |
| O2–Cu1–O2 <sup>i</sup>                | 79.93 (7)   | 99.35(12)   |             | 79.62(8)   | 79.03 (6)    |
| O2–Cu1–N3                             |             | 93.70 (13)  | 92.38 (14)  |            |              |
| N1–Cu1–N3                             |             | 173.86 (12) | 174.39 (16) |            |              |
| O1–Cu1–N3                             |             | 93.16 (12)  | 93.41 (13)  |            |              |
| N1–Cu1–Cu1 <sup>i</sup>               | 133.06 (6)  |             |             | 133.97 (8) | 132.19 (5)   |
| O1–Cu1–Cu1 <sup>i</sup>               | 145.14 (5)  |             |             | 144.36 (6) | 145.18 (4)   |
| O2–Cu1–Cu1 <sup>i</sup>               | 40.17 (4)   |             |             | 40.11 (5)  | 39.70 (4)    |
| O2 <sup>i</sup> –Cu1–Cu1 <sup>i</sup> | 39.76 (5)   |             |             | 39.52 (5)  | 39.33 (4)    |

Symmetry code: (i)  $-x+1, -y, -z+2$  for **1β**,  $x, -y, -1/2+z$  for **1py\***,  $i = -x+1, -y, -z$  for **3**,  $i = -x+1, -y, -z+1$  for **3MeOH**.

**Table S2.** Dihedral angles (°) and atoms defining planes in complexes **1β**, **1py\***, **2py**, **3** and **3MeOH**

| <b>Complex</b> | Dihedral angle, $\angle^\circ$ C1, C2, C3, C4 C5, C6, C7 and C9, C10, C11, C12, C13 and C14 | Dihedral angle, $\angle^\circ$ O1,C1,N2,N1 and N1,C8,C9,C10, O2 |
|----------------|---------------------------------------------------------------------------------------------|-----------------------------------------------------------------|
| <b>1β</b>      | 9.29(12)                                                                                    | 3.32(2)                                                         |
| <b>1py*</b>    | 7.48(21)                                                                                    | 16.31(21)                                                       |
| <b>2py</b>     | 4.79(20)                                                                                    | 7.58(26)                                                        |
| <b>3</b>       | 25.77(12)                                                                                   | 2.36(2)                                                         |
| <b>3MeOH</b>   | 27.59(8)                                                                                    | 2.01(1)                                                         |

**Table S3.** Hydrogen bonds and interactions for complexes: **1 $\beta$** , **1py\***, **2py**, **3**, **3MeOH**, **2EtOH**

| D-H...A                    | d(D-H)   | d(H...A) | d(D...A)  | <(DHA)  | Symmetry code            |
|----------------------------|----------|----------|-----------|---------|--------------------------|
| <b>1<math>\beta</math></b> |          |          |           |         |                          |
| O3-H3O...N1                | 0.81 (1) | 2.75(2)  | 3.450(4)  | 151(2)  | x+1/2, -y+1/2, z+1/2     |
| O3-H3O...N2                | 0.81 (1) | 1.95 (1) | 2.758 (2) | 179 (3) | x+1/2, -y+1/2, z+1/2     |
| C7-H7...O3                 | 0.93     | 2.82     | 3.472(3)  | 128     | x-1/2, -y+1/2, z-1/2     |
| C8-H8...O3                 | 0.93     | 2.93     | 3.469(3)  | 118     | x-1/2, -y+1/2, z-1/2     |
| C11-H11...O1               | 0.93     | 2.21     | 3.031 (3) | 147     | -x+1, -y, -z+2           |
| C4-H4...N1                 | 0.93     | 2.91     | 3.619(3)  | 135     | x+1/2, -y+1/2, z+1/2     |
| C4-H4...N2                 | 0.93     | 2.78     | 3.434(3)  | 128     | x+1/2, -y+1/2, z+1/2     |
| C13-H13...O3               | 0.93     | 2.57     | 3.316(3)  | 137     | -x+1/2+2, +y-1/2, -z+3/2 |
| <b>1py*</b>                |          |          |           |         |                          |
| O3-H3O...N1                | 0.80(4)  | 2.76(4)  | 3.450(4)  | 146(3)  | -x+1/2, -y-1/2, z-1/2    |
| O3-H3O...N2                | 0.80(4)  | 1.93(4)  | 2.725(4)  | 172(3)  | 1/2-x, -1/2-y, -1/2+z    |
| C8-H8...O3                 | 0.93     | 2.76     | 3.368(4)  | 124     | -x+1/2, -y-1/2, z+1/2    |
| C16-H16...O3               | 0.93     | 2.97     | 3.594(5)  | 126     | -x+1/2, -y+1/2, z+1/2    |
| C16-H16...O3               | 0.93     | 2.91     | 3.488(6)  | 121     | -x+1/2, +y+1/2, z        |
| C15-H15...O1               | 0.93     | 2.33     | 2.910(5)  | 120     | -                        |
| C6-H6...N2                 | 0.93     | 2.96     | 3.579(4)  | 126     | -x+1/2, -y-1/2, z-1/2    |
| <b>2py</b>                 |          |          |           |         |                          |
| O3-H3O...N1                | 0.78(5)  | 2.90(5)  | 3.617(5)  | 155(4)  | -x+1/2+1, +y+1/2, -z+5/2 |
| O3-H13O...N2               | 0.78(5)  | 2.02(5)  | 2.800(5)  | 178(5)  | -x+1/2+1, +y+1/2, -z+5/2 |
| C3-H3...O3                 | 0.93     | 2.58     | 3.475(5)  | 162     | -x+1/2+1, +y-1/2, -z+5/2 |
| C4-H4...O4                 | 0.93     | 2.94     | 3.750(5)  | 146     | x-1/2, -y+1/2, z+1/2     |
| C4-H4...N2                 | 0.93     | 2.75(1)  | 3.417(6)  | 130(1)  | -x+1/2+1, +y+1/2, -z+5/2 |
| C8-H8...O3                 | 0.93     | 2.77     | 3.493(6)  | 136     | -x+1/2+1, +y-1/2, -z+5/2 |
| C16-H16...O1               | 0.93     | 2.33     | 2.908(5)  | 120     | -                        |
| C20-H20...O2               | 0.93     | 2.33     | 2.882(5)  | 118     | -                        |
| <b>3</b>                   |          |          |           |         |                          |
| O3-H3O...N1                | 0.80(3)  | 2.96(3)  | 3.618(3)  | 141(2)  | -x+1/2+1, -y+1/2, z+1/2  |
| O3-H3O...N2                | 0.80(3)  | 1.97(3)  | 2.756(3)  | 165(4)  | 3/2-x, 1/2-y, 1/2+z      |
| C7-H7...O3                 | 0.93     | 2.79     | 3.466(4)  | 130     | -x+1/2+1, -y+1/2, z-1/2  |
| C8-H8...O3                 | 0.93     | 2.79     | 3.518(4)  | 136     | -x+1/2+1, -y+1/2, z-1/2  |
| C11-H11...O1               | 0.93     | 2.180    | 3.011(3)  | 148     | 1-x, -y, -z              |
| C15-H15B...O4              | 0.96     | 2.72     | 3.521(5)  | 142     | -x, -y, -z-1             |
| <b>3MeOH</b>               |          |          |           |         |                          |
| O5-H5O...O3                | 0.81(2)  | 2.14(3)  | 2.907(2)  | 161(2)  | x+1/2, -y+1/2, z-1/2     |
| O3-H3O...N1                | 0.82(2)  | 2.843(2) | 3.532(2)  | 144(2)  | x+1/2, -y+1/2, z+1/2     |
| O3-H3O...N2                | 0.83(2)  | 1.88(2)  | 2.685(2)  | 166(2)  | x+1/2, -y+1/2, z+1/2     |
| C3-H3...O3                 | 0.93     | 2.94     | 3.766(3)  | 149     | x+1/2, -y+1/2, z-1/2     |
| C4-H4...N2                 | 0.93     | 2.93     | 3.540(3)  | 125     | x+1/2, -y+1/2, z-1/2     |
| C7-H7...O3                 | 0.93     | 2.67     | 3.352(3)  | 131     | x-1/2, -y+1/2, z-1/2     |
| C8-H8...O3                 | 0.93     | 2.71     | 3.428(2)  | 135     | x-1/2, -y+1/2, z-1/2     |
| C8-H8...O4                 | 0.93     | 2.66     | 3.548(3)  | 159     | x-1, +y, +z              |
| C14-H14...O4               | 0.93     | 2.72     | 3.588(3)  | 156     | x-1, +y, +z              |
| C11-H11...O1               | 0.93     | 2.19     | 3.023(2)  | 149     | -x+1, -y, -z+1           |
| C15-H15B...O4              | 0.96     | 2.92     | 3.709(3)  | 141     | -x+1, -y, -z             |
| C16-H16B...O5              | 0.96     | 2.61     | 3.307(3)  | 130     | -x, -y, -z               |
| <b>2MeOH</b>               |          |          |           |         |                          |
| O34-H34O...O2W             | 0.84 (1) | 1.83 (1) | 2.660 (7) | 170 (1) | -                        |
| O44-H44O...O5W             | 0.84 (1) | 1.90 (1) | 2.711 (8) | 162 (1) | -                        |
| O54-H54O...O1W             | 0.84 (1) | 1.82 (1) | 2.641 (7) | 167 (1) | -                        |
| O1W-H1WB...N41             | 0.86(1)  | 2.86(9)  | 3.617(7)  | 148(5)  | -                        |
| O1W-H1WB...N42             | 0.86(1)  | 1.89(7)  | 2.732(7)  | 165(6)  | -                        |
| O2W-H2WA...O10W            | 0.86(1)  | 2.20(10) | 2.88(13)  | 135(3)  | -                        |
| O3W-H3WA...N62             | 0.86(1)  | 2.18(9)  | 2.910(7)  | 143(6)  | -                        |
| O4W-H4WA...O10W            | 0.86(1)  | 2.06(11) | 2.87(13)  | 157(10) | -                        |
| O14-H14O...O31             | 0.84(1)  | 1.897(4) | 2.698(6)  | 159(1)  | x, -y+1/2, z+1/2         |
| O24-H24O...N52             | 0.84(1)  | 1.960(5) | 2.795(7)  | 172(1)  | -x+1, +y-1/2, -z+1/2     |

|              |         |          |          |        |                        |
|--------------|---------|----------|----------|--------|------------------------|
| O24–H24O…N51 | 0.84(1) | 2.903(5) | 3.664(7) | 152(1) | $-x+1, +y-1/2, -z+1/2$ |
| O64–H64O…O51 | 0.84(1) | 1.822(4) | 2.655(6) | 172(1) | $x, -y+1/2, +z-1/2$    |
| O4W–H4WB…O1W | 0.86(7) | 2.03(11) | 2.809(8) | 151(5) | $x, -y+1/2, +z-1/2$    |
| O84–H84O…N31 | 0.84(1) | 2.806(5) | 3.642(6) | 174(1) | $-x, +y+1/2, -z+1/2$   |
| O1W–H1WA…N81 | 0.86(7) | 2.75(7)  | 3.475(6) | 143(6) | $-x+1, +y+1/2, -z+1/2$ |
| O1W–H1WA…N82 | 0.86(7) | 1.93(7)  | 2.773(6) | 169(7) | $-x+1, +y+1/2, -z+1/2$ |
| O2W–H2WB…N21 | 0.86(7) | 2.73(7)  | 3.494(6) | 150(5) | $-x+1, +y+1/2, -z+1/2$ |
| O2W–H2WB…N22 | 0.86(7) | 1.97(8)  | 2.801(7) | 163(7) | $-x+1, +y+1/2, -z+1/2$ |
| O7M–H7M…O5W  | 0.84(1) | 1.957(6) | 2.65(11) | 139(1) | $x, -y-1/2, +z-1/2$    |

**Contact distances formed by solvent molecules of crystallization in 2MeOH complex indicating possible hydrogen bonds**

|          |  |  |           |  |
|----------|--|--|-----------|--|
| O1W…O4W  |  |  | 2.808(8)  |  |
| O2W…N72  |  |  | 2.740(7)  |  |
| O2W…O34  |  |  | 2.660(6)  |  |
| O3W…O7W  |  |  | 2.641(9)  |  |
| O3W…N62  |  |  | 2.910(8)  |  |
| O3W…O4W  |  |  | 2.754(9)  |  |
| O4W…O3W  |  |  | 2.754(9)  |  |
| O5W…O44  |  |  | 2.711(9)  |  |
| O6W…O7M  |  |  | 2.598(14) |  |
| O6W…O74  |  |  | 2.900(8)  |  |
| O6W…N12  |  |  | 2.885(8)  |  |
| O7M…O6W  |  |  | 2.598(14) |  |
| O7M…O5W  |  |  | 2.653(11) |  |
| O7W…O3W  |  |  | 2.641(9)  |  |
| O7W…O74  |  |  | 2.677(9)  |  |
| O9W…O8W  |  |  | 3.031(15) |  |
| O10W…O2W |  |  | 2.873(12) |  |
| O34…O2W  |  |  | 2.660(6)  |  |
| O54…O10W |  |  | 3.015(12) |  |
| O74…O7W  |  |  | 2.677(9)  |  |
| O74…O6W  |  |  | 2.900(8)  |  |

**2EtOH**

|              |           |           |           |         |                          |
|--------------|-----------|-----------|-----------|---------|--------------------------|
| O14–H14O…O14 | 0.83 (8)  | 1.93 (9)  | 2.663 (7) | 148 (8) | $1-x, y, 3/2-z$          |
| O34–H34O…N12 | 0.84(1)   | 1.930(4)  | 2.769 (5) | 176 (1) | $-x+1/2, +y-1/2, -z+3/2$ |
| O24–H24O…O31 | 0.84 (10) | 1.95 (10) | 2.757 (7) | 161 (8) | $x-1/2, -y+3/2, +z-1/2$  |

**Contact distances formed by solvent molecules of crystallization in 2EtOH complex indicating possible hydrogen bonds**

|         |  |  |          |   |
|---------|--|--|----------|---|
| O2E…O1W |  |  | 2.96(3)  | - |
| O1E…O14 |  |  | 2.570(8) | - |



**Table S4.** Selected bond lengths [ $\text{\AA}$ ] for complex **2MeOH**

|         | Bond length |         | Bond length |
|---------|-------------|---------|-------------|
| Cu1–O11 | 1.899 (5)   | Cu5–O51 | 1.925 (4)   |
| Cu1–N11 | 1.913 (4)   | Cu5–O52 | 1.932 (4)   |
| Cu1–O12 | 1.921 (4)   | Cu5–O62 | 1.982 (4)   |
| Cu1–O42 | 1.979 (4)   | Cu5–O63 | 2.360 (4)   |
| Cu1–O43 | 2.306 (4)   | Cu5–O72 | 2.539(4)    |
| Cu1–O22 | 2.745(4)    | Cu6–O61 | 1.881 (4)   |
| Cu2–N21 | 1.898 (5)   | Cu6–O62 | 1.916 (4)   |
| Cu2–O21 | 1.916 (4)   | Cu6–N61 | 1.916 (5)   |
| Cu2–O22 | 1.947 (4)   | Cu6–O72 | 1.994 (4)   |
| Cu2–O32 | 1.992 (4)   | Cu6–O73 | 2.335 (4)   |
| Cu2–O33 | 2.276 (4)   | Cu7–N71 | 1.910 (5)   |
| Cu2–O12 | 2.663(4)    | Cu7–O71 | 1.927 (4)   |
| Cu3–N31 | 1.918 (5)   | Cu7–O82 | 1.952 (4)   |
| Cu3–O31 | 1.920 (4)   | Cu7–O72 | 1.965 (4)   |
| Cu3–O32 | 1.934 (4)   | Cu7–O83 | 2.277 (4)   |
| Cu3–O12 | 1.983 (4)   | Cu7–O52 | 2.701(4)    |
| Cu3–O13 | 2.329 (4)   | Cu8–N81 | 1.912 (5)   |
| Cu3–O42 | 2.578(4)    | Cu8–O81 | 1.936 (4)   |
| Cu4–N41 | 1.909 (4)   | Cu8–O82 | 1.952 (4)   |
| Cu4–O41 | 1.947 (4)   | Cu8–O52 | 1.995 (4)   |
| Cu4–O22 | 1.961 (4)   | Cu8–O53 | 2.245 (4)   |
| Cu4–O42 | 1.980 (4)   | Cu8–O62 | 2.688(4)    |
| Cu4–O23 | 2.278 (4)   |         |             |
| Cu4–O32 | 2.683(4)    |         |             |
| Cu5–N51 | 1.915 (5)   |         |             |

**Table S5.** Selected bond lengths [ $\text{\AA}$ ] for complex **2EtOH**

|         | Bond length |
|---------|-------------|
| Cu1–O11 | 1.911 (3)   |
| Cu1–N11 | 1.921 (3)   |
| Cu1–O12 | 1.929 (3)   |
| Cu1–O32 | 1.981 (3)   |
| Cu1–O33 | 2.361 (3)   |
| Cu1–O22 | 2.734(3)    |
| Cu2–N21 | 1.932(3)    |
| Cu2–O21 | 1.916(3)    |
| Cu2–O22 | 1.941(3)    |
| Cu2–O42 | 1.993(3)    |
| Cu2–O43 | 2.343(3)    |
| Cu2–O12 | 2.713(3)    |
| Cu3–N31 | 1.918(3)    |
| Cu3–O31 | 1.943(3)    |
| Cu3–O32 | 1.964(3)    |
| Cu3–O22 | 1.996(3)    |
| Cu3–O23 | 2.350(3)    |
| Cu3–O42 | 2.585(3)    |
| Cu4–N41 | 1.906(3)    |
| Cu4–O41 | 1.926(3)    |
| Cu4–O12 | 1.976(3)    |
| Cu4–O42 | 1.991(3)    |
| Cu4–O13 | 2.303(3)    |
| Cu4–O32 | 2.641(3)    |

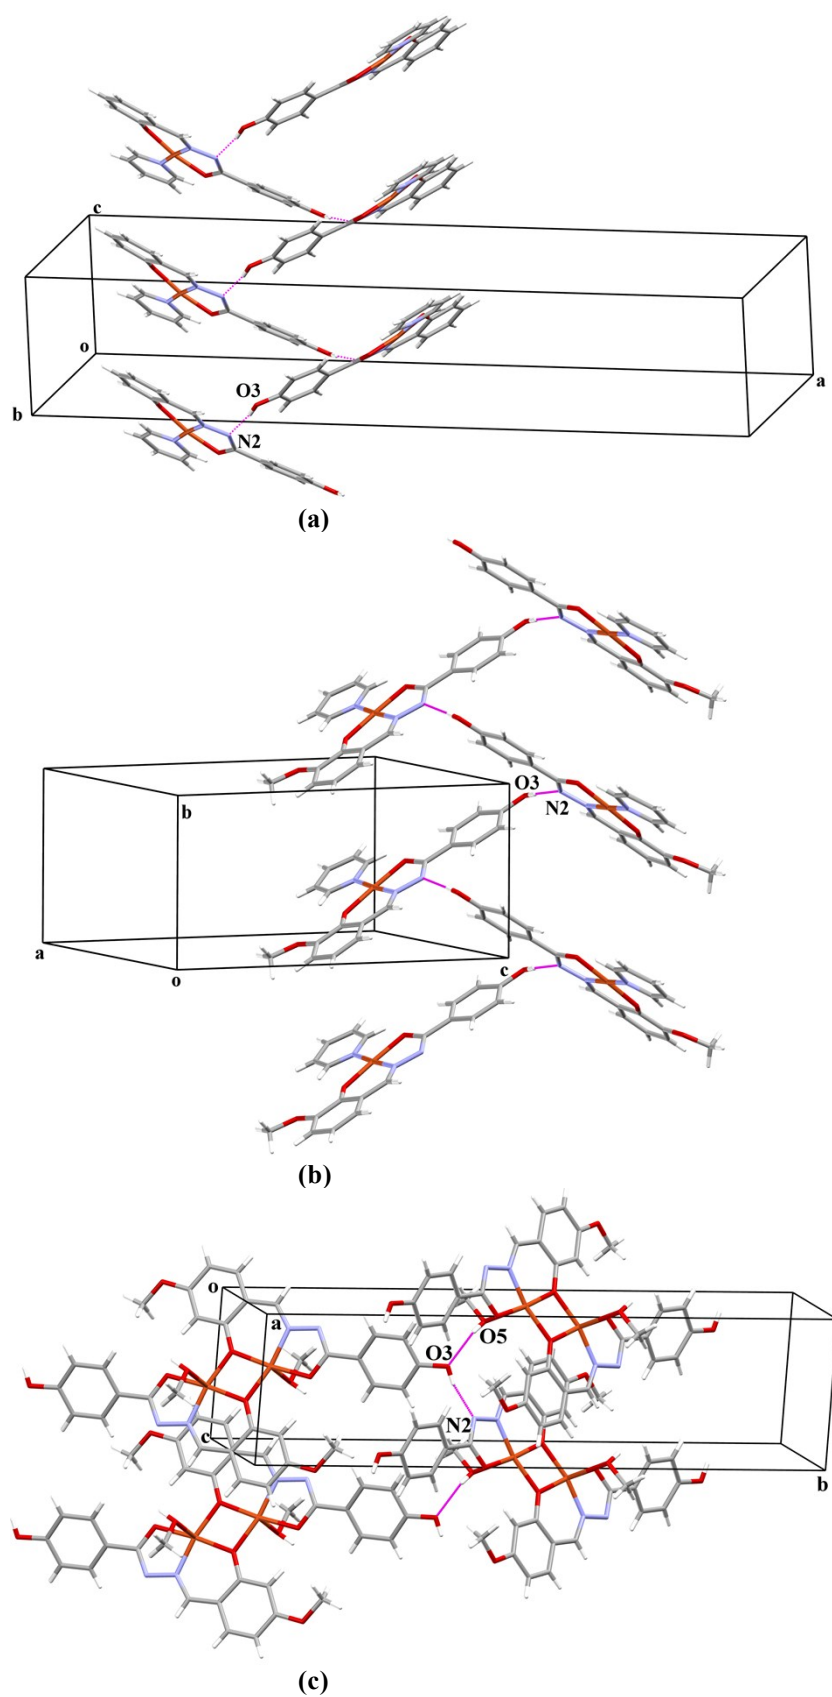

**Fig. S7** Fraction of crystal structure of complex (a) **1py\***, (b) **2py** and (c) **3MeOH** showing assembling of complex molecules *via* O3–H3O···N2 and O3–H3O···O5 (in **3MeOH**) intermolecular hydrogen bond (denoted as magenta dashed line) into *zig-zag* 1D infinite chain along *b* axis (a and b) and *a* axis (c).

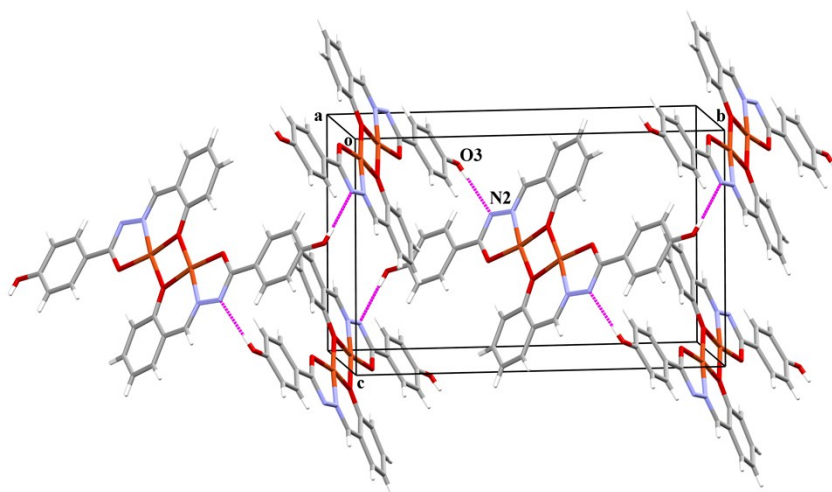

(a)

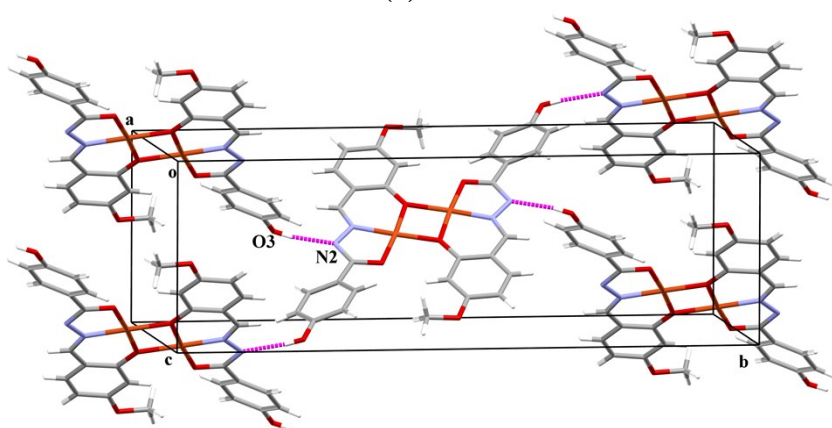

(b)

**Fig. S8** (a) Fraction of crystal structure of complex **1β** showing assembling of complex molecules *via* O3–H3O···N2 intermolecular hydrogen bond (denoted as magenta dashed line). (b) Fraction of crystal structure of complex **3** showing assembling of complex molecules *via* O3–H3O···N2 intermolecular hydrogen bond (denoted as magenta dashed line) into 3D network.

## Ligands

**Table S6.**  $^1\text{H}$  and  $^{13}\text{C}$  chemical shifts (ppm) of compounds  $\text{H}_2\text{L}^{\text{H}}$ ,  $\text{H}_2\text{L}^{3\text{OMe}}\cdot\text{H}_2\text{O}$  and  $\text{H}_2\text{L}^{4\text{OMe}}\cdot\text{H}_2\text{O}$

| Atom          | $\text{H}_2\text{L}^{\text{H}}$      |                                         | $\text{H}_2\text{L}^{3\text{OMe}}\cdot\text{H}_2\text{O}$ |                                      | $\text{H}_2\text{L}^{4\text{OMe}}\cdot\text{H}_2\text{O}$ |                                         |
|---------------|--------------------------------------|-----------------------------------------|-----------------------------------------------------------|--------------------------------------|-----------------------------------------------------------|-----------------------------------------|
|               | $\delta/\text{ppm}$ ( $^1\text{H}$ ) | $\delta/\text{ppm}$ ( $^{13}\text{C}$ ) | $\delta/\text{ppm}$ ( $^1\text{H}$ )                      | $\delta/\text{ppm}$ ( $^1\text{H}$ ) | $\delta/\text{ppm}$ ( $^1\text{H}$ )                      | $\delta/\text{ppm}$ ( $^{13}\text{C}$ ) |
| $\alpha$      | 8.63                                 | 147.72                                  | 8.64                                                      | 8.55                                 | 8.55                                                      | 148.21                                  |
| <b>1</b>      | –                                    | 118.66                                  | –                                                         | –                                    | –                                                         | 111.81                                  |
| <b>2</b>      | –                                    | 157.45                                  | –                                                         | –                                    | –                                                         | 159.41                                  |
| <b>3</b>      | 6.91                                 | 119.23                                  | –                                                         | 6.52                                 | 6.52                                                      | 106.29                                  |
| <b>4</b>      | 7.30                                 | 131.08                                  | 7.12                                                      | –                                    | –                                                         | 161.88                                  |
| <b>5</b>      | 6.94                                 | 116.37                                  | 6.87                                                      | 6.53                                 | 6.53                                                      | 106.29                                  |
| <b>6</b>      |                                      | 131.08                                  | 7.02                                                      | 7.39                                 | 7.39                                                      | 131.17                                  |
| <b>1'</b>     | 11.94                                | –                                       | 11.92                                                     | 11.81                                | 11.81                                                     | –                                       |
| <b>2'</b>     | –                                    | 162.48                                  | –                                                         | –                                    | –                                                         | 162.31                                  |
| <b>3'</b>     | –                                    | 123.21                                  | –                                                         | –                                    | –                                                         | 123.33                                  |
| <b>4', 8'</b> | 7.87                                 | 129.70                                  | 7.87                                                      | 7.87                                 | 7.87                                                      | 129.61                                  |
| <b>5', 7'</b> | 6.91                                 | 115.11                                  | 6.92                                                      | 6.92                                 | 6.92                                                      | 115.09                                  |
| <b>6'</b>     | 10.18                                | 160.91                                  |                                                           | –                                    | –                                                         | 160.81                                  |
| <b>OH-2</b>   | 11.47                                | –                                       | 11.20                                                     | 11.83                                | 11.83                                                     | –                                       |
| <b>OH-6'</b>  | 7.51                                 | –                                       | 10.19                                                     | 10.16                                | 10.16                                                     | –                                       |
| <b>OMe</b>    |                                      |                                         | 3.83                                                      | 3.79                                 | 3.79                                                      | 55.21                                   |

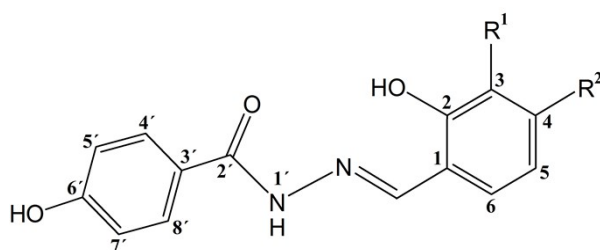

| $\text{R}^1$   | $\text{R}^2$   | ligand                                                    |
|----------------|----------------|-----------------------------------------------------------|
| H              | H              | $\text{H}_2\text{L}^{\text{H}}$                           |
| $\text{OCH}_3$ | H              | $\text{H}_2\text{L}^{3\text{OMe}}\cdot\text{H}_2\text{O}$ |
| H              | $\text{OCH}_3$ | $\text{H}_2\text{L}^{4\text{OMe}}\cdot\text{H}_2\text{O}$ |

**Scheme S1** The structural formula of  $\text{H}_2\text{L}$  with the NMR numbering scheme

## Reaction conditions for solution based synthetic methods and yields

**Table S7.** Reaction conditions and yields

|                             | solvent | <b>RT</b> <sup>a</sup> | <b>R</b> <sup>a</sup> | <b>ST</b> <sup>a</sup> | <b>E</b> <sup>a</sup> |
|-----------------------------|---------|------------------------|-----------------------|------------------------|-----------------------|
| <b>1<math>\alpha</math></b> |         |                        |                       |                        |                       |
|                             | MeOH    | ✓ (82%)                | ✱                     | ✱                      | ✓ (23%)               |
|                             | EtOH    | ✓ (70%)                | ✓ (89%)               | ✱                      | ✓ (17%)               |
|                             | ACN     | ✱                      | ✱                     | ✱                      |                       |
| <b>1<math>\beta</math></b>  |         |                        |                       |                        |                       |
|                             | MeOH    | ×                      | ✱                     | ✱                      | ×                     |
|                             | EtOH    | ×                      | ×                     | ✱                      | ×                     |
|                             | ACN     | ✱                      | ✱                     | ✱                      |                       |
| <b>1py</b>                  | MeOH    | ✓ (79%)                | ✓ (84%)               | ✱                      | ✓ (35%)               |
| <b>2MeOH</b>                | MeOH    | ✓ (35%)                | ✓ (65 %)              | ✓ (70%)                | ✓ (29%)               |
| <b>2EtOH</b>                | EtOH    | ✓ (41%)                | ✓ (47%)               | ✓ (52%)                | ✓ (18%)               |
| <b>2py</b>                  | MeOH    | ✓ (76%)                | ✓ (81%)               | ✓ (52%)                | ✱                     |
| <b>3</b>                    |         |                        |                       |                        |                       |
|                             | MeOH    | ×                      | ×                     | ✓ (88%)                | ×                     |
|                             | EtOH    | ×                      | ✓ (88%)               | ✓ (94%)                |                       |
|                             | ACN     | ✓ (76%)                | ✓ (88%)               | ✓ (88%)                |                       |
| <b>3MeOH</b>                | MeOH    | ✓ (79%)                | ✓ (84%)               | ×                      | ✓ (22%)               |
| <b>3EtOH</b>                | EtOH    | ✓ (87%)                | ×                     | ×                      | ✱                     |
| <b>3py</b>                  | MeOH    | ✓ (81%)                | ✓ (90%)               | ✓ (90%)                | ✓ (36%)               |

<sup>a</sup> **RT** = Room Temperature; **R** = Reflux; **ST** = Solvothermal synthesis; **E** = Electrochemical synthesis;  
 ✓ successful synthetic route; ✱ mixture of products; × compound was not obtainable *via* this method
